# Supplementary material for: 10 Years of Pressurized Intraperitoneal Aerosol Chemotherapy (PIPAC): A Systematic Review and Meta-Analysis
Source: MDPI journal article supplement (doi:10.3390/cancers15041125), 2023-02-09
Supplement: s1 [file s1]

**Table S2.** Study quality assessment according to the Newcastle-Ottawa Scale (NOS).

|                                                                                               | Demtroder,<br>2015 | Ellebæk,<br>2020 <sup>a</sup> | Gockel,<br>2020 | Tabchouri,<br>2021 | Rovers,<br>2021 | Nadiraze,<br>2016 | Feldbrügge,<br>2021 | Gockel,<br>2018 | Di Giorgio,<br>2020 <sup>a</sup> | Alyami,<br>2021 <sup>a</sup> | Sindayigaya,<br>2021 |
|-----------------------------------------------------------------------------------------------|--------------------|-------------------------------|-----------------|--------------------|-----------------|-------------------|---------------------|-----------------|----------------------------------|------------------------------|----------------------|
| <b>Group selection</b>                                                                        |                    |                               |                 |                    |                 |                   |                     |                 |                                  |                              |                      |
| 1) Representativeness of the exposed cohort                                                   | *                  | *                             | *               | *                  | *               | *                 | *                   | *               | *                                | *                            | *                    |
| 2) Selection of the non-exposed cohort                                                        | -                  | -                             | -               | *                  | -               | -                 | *                   | -               | -                                | *                            | -                    |
| 3) Ascertainment of exposure                                                                  | *                  | *                             | *               | *                  | *               | *                 | *                   | *               | *                                | *                            | *                    |
| 4) Demonstration that outcome of interest was not present at start of study                   | -                  | *                             | *               | *                  | *               | -                 | *                   | -               | *                                | *                            | *                    |
| <b>Comparability</b>                                                                          |                    |                               |                 |                    |                 |                   |                     |                 |                                  |                              |                      |
| 5) Comparability of cohorts on the basis of the design or analysis controlled for confounders | **                 | *                             | *               | *                  | -               | -                 | *                   | *               | **                               | *                            | *                    |
| <b>Outcome</b>                                                                                |                    |                               |                 |                    |                 |                   |                     |                 |                                  |                              |                      |
| 6) Assessment of outcome                                                                      | *                  | *                             | *               | *                  | *               | *                 | *                   | *               | *                                | *                            | *                    |
| 7) Was follow-up long enough for outcomes to occur                                            | *                  | *                             | -               | *                  | *               | *                 | -                   | *               | *                                | *                            | *                    |
| 8) Adequacy of follow-up of cohorts                                                           | *                  | -                             | -               | *                  | *               | *                 | -                   | *               | *                                | *                            | *                    |
| <b>Summary score (maximum of 9 stars)</b>                                                     | <b>7</b>           | <b>6</b>                      | <b>5</b>        | <b>8</b>           | <b>6</b>        | <b>5</b>          | <b>6</b>            | <b>6</b>        | <b>8</b>                         | <b>8</b>                     | <b>7</b>             |

[illegible]

|                                                                                               | Nielsen,<br>2021 | Graversen,<br>2017 | Falkenstein,<br>2018 | Horvath,<br>2018 | Khosrawipour,<br>2017 | Giger-Pabst,<br>2018 | Alyami,<br>2017 | Alyami,<br>2021 <sup>b</sup> | Ceribelli,<br>2020 | Cuadrado<br>Ayuso,<br>2021 | De Simone,<br>2020 |
|-----------------------------------------------------------------------------------------------|------------------|--------------------|----------------------|------------------|-----------------------|----------------------|-----------------|------------------------------|--------------------|----------------------------|--------------------|
| <b>Group selection</b>                                                                        |                  |                    |                      |                  |                       |                      |                 |                              |                    |                            |                    |
| 1) Representativeness of the exposed cohort                                                   | *                | -                  | *                    | *                | *                     | *                    |                 | *                            | *                  |                            | *                  |
| 2) Selection of the non-exposed cohort                                                        | -                | -                  | -                    | *                | -                     |                      |                 | *                            |                    |                            |                    |
| 3) Ascertainment of exposure                                                                  | *                | *                  | *                    | *                | *                     | *                    | *               | *                            | *                  | *                          | *                  |
| 4) Demonstration that outcome of interest was not present at start of study                   | -                | -                  | *                    | *                | -                     |                      | *               |                              |                    | *                          | *                  |
| <b>Comparability</b>                                                                          |                  |                    |                      |                  |                       |                      |                 |                              |                    |                            |                    |
| 5) Comparability of cohorts on the basis of the design or analysis controlled for confounders | *                | **                 | **                   | *                | -                     | *                    | *               |                              | *                  | *                          | **                 |
| <b>Outcome</b>                                                                                |                  |                    |                      |                  |                       |                      |                 |                              |                    |                            |                    |
| 6) Assessment of outcome                                                                      | *                | *                  | *                    | *                | *                     | *                    | *               |                              | *                  | *                          | *                  |
| 7) Was follow-up long enough for outcomes to occur                                            | *                | -                  | *                    | *                | *                     | *                    |                 | *                            | *                  |                            | *                  |
| 8) Adequacy of follow-up of cohorts                                                           | *                | -                  | *                    | *                | *                     | *                    |                 | *                            | *                  |                            | *                  |
| <b>Summary score (maximum of 9 stars)</b>                                                     | <b>6</b>         | <b>4</b>           | <b>8</b>             | <b>7</b>         | <b>5</b>              | <b>6</b>             | <b>4</b>        | <b>5</b>                     | <b>6</b>           | <b>4</b>                   | <b>8</b>           |

|                                                                                               | Dumont,<br>2020 | Girshally,<br>2016 | Graversen,<br>2018 <sup>a</sup> | Graversen,<br>2018 <sup>b</sup> | Graversen,<br>2020 | Hubner,<br>2017 | Katdare,<br>2019 | Kim,<br>2020 | Kurtz,<br>2018 | Odendahl,<br>2015 | Račkauskas,<br>2021 |
|-----------------------------------------------------------------------------------------------|-----------------|--------------------|---------------------------------|---------------------------------|--------------------|-----------------|------------------|--------------|----------------|-------------------|---------------------|
| <b>Group selection</b>                                                                        |                 |                    |                                 |                                 |                    |                 |                  |              |                |                   |                     |
| 1) Representativeness of the exposed cohort                                                   | *               | *                  | *                               | *                               | *                  | *               |                  | *            | *              | *                 | *                   |
| 2) Selection of the non-exposed cohort                                                        |                 | *                  |                                 | *                               |                    | *               |                  |              |                | *                 | -                   |
| 3) Ascertainment of exposure                                                                  | *               | *                  | *                               | *                               | *                  | *               | *                | *            | *              | *                 | *                   |
| 4) Demonstration that outcome of interest was not present at start of study                   |                 |                    | *                               | *                               | *                  | *               |                  | *            | *              | *                 | *                   |
| <b>Comparability</b>                                                                          |                 |                    |                                 |                                 |                    |                 |                  |              |                |                   |                     |
| 5) Comparability of cohorts on the basis of the design or analysis controlled for confounders | *               | **                 | *                               | *                               | *                  | *               |                  | **           | *              | *                 | *                   |
| <b>Outcome</b>                                                                                |                 |                    |                                 |                                 |                    |                 |                  |              |                |                   |                     |
| 6) Assessment of outcome                                                                      | *               | *                  | *                               | *                               | *                  | *               | *                | *            | *              | *                 | *                   |
| 7) Was follow-up long enough for outcomes to occur                                            | *               | *                  |                                 |                                 |                    |                 | *                | *            | *              | *                 | *                   |
| 8) Adequacy of follow-up of cohorts                                                           | *               | *                  | *                               | *                               | *                  |                 |                  | *            | *              | *                 | *                   |
| <b>Summary score (maximum of 9 stars)</b>                                                     | <b>6</b>        | <b>8</b>           | <b>6</b>                        | <b>8</b>                        | <b>6</b>           | <b>5</b>        | <b>3</b>         | <b>8</b>     | <b>7</b>       | <b>8</b>          | <b>7</b>            |

|                                                                                               | Robella,<br>2016 | Robella,<br>2021 | Sgarbura,<br>2019 | Siebert,<br>2021 | Solass,<br>2014 | Somashekhar,<br>2019 | Taibi,<br>2021 | Willaert,<br>2019 |
|-----------------------------------------------------------------------------------------------|------------------|------------------|-------------------|------------------|-----------------|----------------------|----------------|-------------------|
| Group selection                                                                               |                  |                  |                   |                  |                 |                      |                |                   |
| 1) Representativeness of the exposed cohort                                                   | *                |                  | *                 | *                | -               | -                    | *              | *                 |
| 2) Selection of the non-exposed cohort                                                        | -                |                  | -                 | *                | -               | -                    |                | -                 |
| 3) Ascertainment of exposure                                                                  | *                | *                | *                 | *                | *               | *                    | *              | *                 |
| 4) Demonstration that outcome of interest was not present at start of study                   | *                | *                | *                 | *                | *               | *                    |                | *                 |
| Comparability                                                                                 |                  |                  |                   |                  |                 |                      |                |                   |
| 5) Comparability of cohorts on the basis of the design or analysis controlled for confounders | *                | *                | *                 |                  | *               | *                    | **             | *                 |
| Outcome                                                                                       |                  |                  |                   |                  |                 |                      |                |                   |
| 6) Assessment of outcome                                                                      | *                | *                | *                 | *                | *               | *                    | *              | *                 |
| 7) Was follow-up long enough for outcomes to occur                                            | *                | *                | *                 | *                | *               | *                    | *              | *                 |
| 8) Adequacy of follow-up of cohorts                                                           | *                | *                | *                 | *                | *               | *                    | *              | *                 |
| Summary score (maximum of 9 stars)                                                            | 7                | 6                | 7                 | 7                | 6               | 6                    | 7              | 7                 |
