# Supplementary figures and images for: 10 Years of Pressurized Intraperitoneal Aerosol Chemotherapy (PIPAC): A Systematic Review and Meta-Analysis
Source: MDPI journal article supplement (doi:10.3390/cancers15041125), 2023-02-09

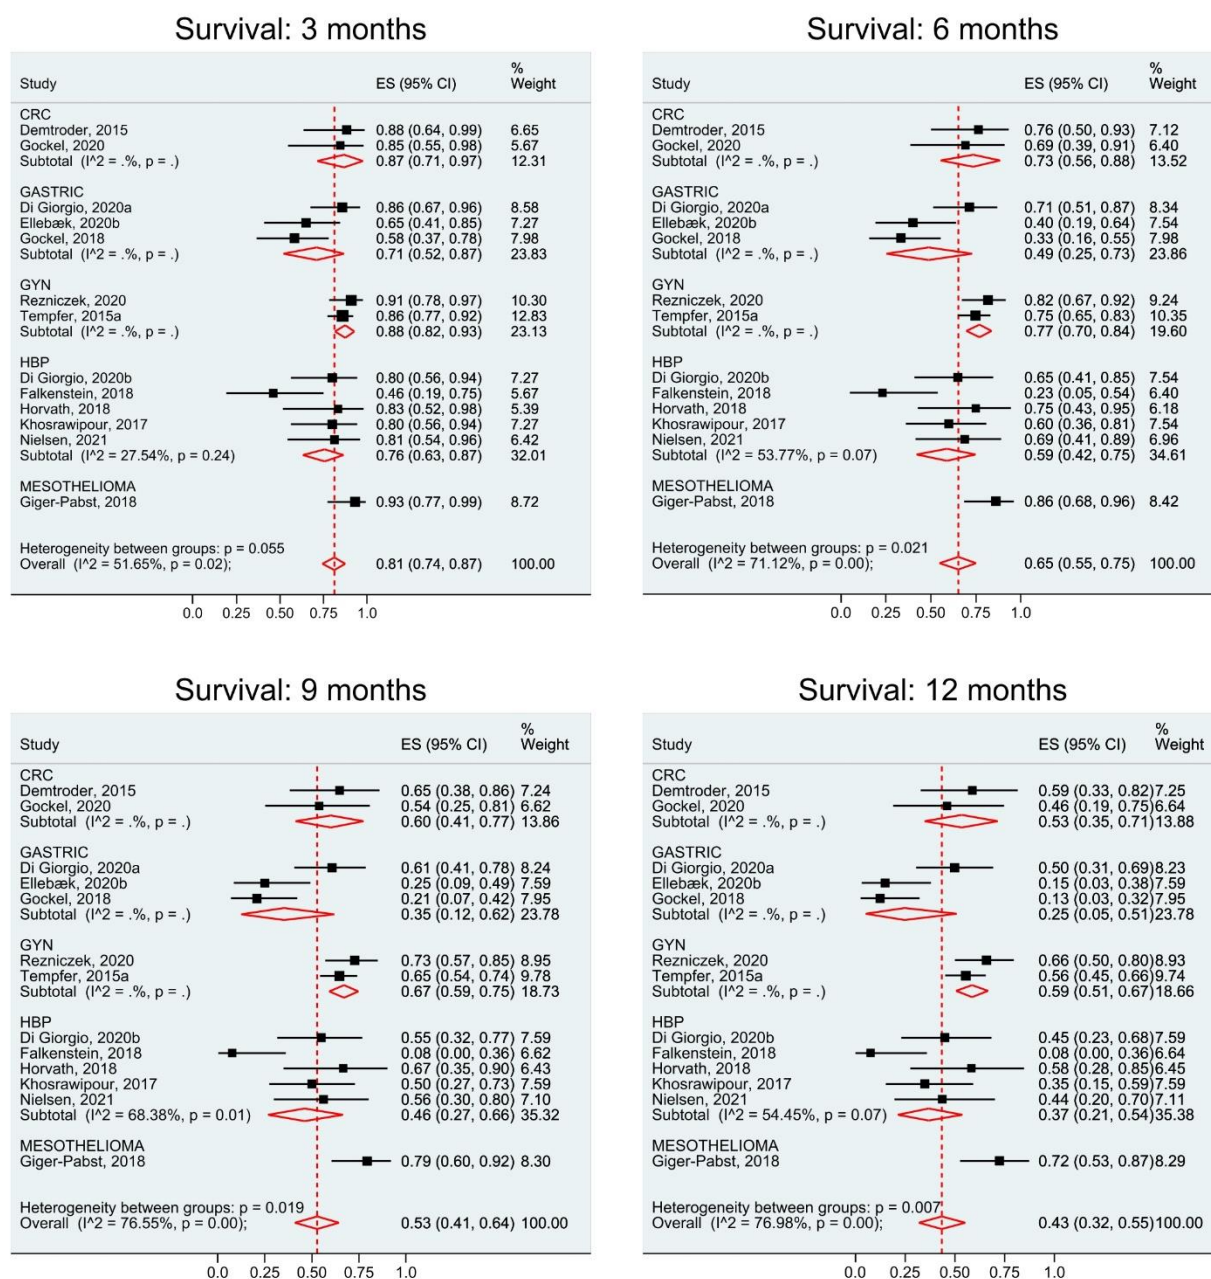

**Figure S1.** Forest plot of pooled prevalence of estimated survival at 3, 6, 9, 12 months.

Supplement: s1 [file s1]
